# Supplementary material for: Ionic liquid enables high-performance, self-powered CsPbBr3 perovskite nanonet photodetector
Source: Royal Society of Chemistry journal article supplement (doi:10.1039/d3cc02094k), 2023-01-01
Supplement: d3cc02094k1.pdf [file d3cc02094k1.pdf]

*Supporting Information*

**Ionic Liquid enables High-Performance, Self-Powered CsPbBr<sub>3</sub>  
Perovskite Nanonet Photodetector**

*Hai Zhou,<sup>1, 2, 3</sup> \* Rui Wang,<sup>1, 3</sup> Xuhui Zhang,<sup>1, 3</sup> Bo 'ao Xiao,<sup>1, 3</sup> Zihao Shuang<sup>1</sup>, Dingjun  
Wu<sup>1</sup> and Pingli Qin<sup>2, \*</sup>*

<sup>1</sup>International School of Microelectronics, Dongguan University of Technology,  
Dongguan, Guangdong, 523808, China

<sup>2</sup>Hubei Key Laboratory of Optical Information and Pattern Recognition, Wuhan  
Institute of Technology, Wuhan, 430205, China

<sup>3</sup>Faculty of Physics & Electronic Science, Hubei University, Wuhan, 430062, China.

Corresponding Author

Prof. Hai Zhou: [hizhou@dgut.edu.cn](mailto:hizhou@dgut.edu.cn)

Prof. Pingli Qin: [qpl2015@wit.edu.cn](mailto:qpl2015@wit.edu.cn)

### (1) Materials

Tin dioxide (15% (wt%)) is purchased from Alfa Aesar, polyvinyl pyrrolidone (PVP), 2,2'-azodiisobutyronitrile (AIBN) (99%), styrene (>99.5%), sodium dodecyl sulfate (>99%), dimethyl sulfoxide (>99.9%), cesium bromide (99.999%), lead bromide (99.99%), 1-butyl-3-methylimidazole bromide (>97%), and chlorobenzene (99%) are all purchased from Aladdin.

### (2) Substrate treatment

The patterned ITO glass substrate is placed in an orderly manner on a cleaning rack, and placed in a 250 mL beaker. Add washing solution, deionized water, acetone, and anhydrous ethanol in sequence and ultrasonically clean for 30 min to make the substrate surface as smooth as a mirror. After cleaning, put it in a 60°C oven to remove the ethanol on the substrate surface. Then, place the substrate in a UV ozone cleaner for 30 min to improve the adhesion of the substrate surface.

### (3) Preparation of SnO<sub>2</sub> electron transport layer

Place the treated ITO substrate onto the spin coater, and 150 µL of SnO<sub>2</sub> solution is added to the substrate surface, and spin-coated at 3000 rpm for 30 s. Then, the substrate is put onto a hot plate at 150°C for approximately 30 min.

### (4) Preparation of monolayer PS microspheres

Drop 100 µL of ethanol dispersion containing PS microspheres into a beaker filled with deionized water. After the PS microspheres are evenly dispersed on the surface of the water, drop 1 mL of SDS solution from the edge of the beaker to form a dense monolayer of PS microspheres on the water surface. Insert the ITO substrate below the liquid surface and slowly lift it up to obtain a monolayer of PS microspheres. Use a piece of absorbent paper to remove the water at the edge, so that the PS microspheres can evenly attach to the substrate surface. Then place the substrate on a heating plate at 60°C for 1 hour for annealing.

### (5) Preparation of CsPbBr<sub>3</sub> nanonet film

To investigate the effect of BMIMBr ionic liquid on the CsPbBr<sub>3</sub> perovskite PD, different concentrations of BMIMBr ionic liquid is added to the precursor solution to determine the optimal concentration. The specific experimental steps are as follows:

Dissolve various concentrations (0, 0.5, 1, 2, and 5 mg) of BMIMBr ionic liquid, 0.1064 g cesium bromide (99.999%), and 0.1835 g lead bromide (99.99%) in 1 mL of DMSO (99.9%) to form CsPbBr<sub>3</sub> solutions. After 12 hours of standing to ensure complete dissolution, the CsPbBr<sub>3</sub> solution is filtered through a filter head. Then, 80 µL of the CsPbBr<sub>3</sub> solution is evenly dropped onto the substrate, and the spin coater is set to 1500 rpm for 40 s. After that, the substrate is transferred to a heating plate and annealed for 30 min. Finally, the prepared CsPbBr<sub>3</sub> thin film is immersed in a glass bottle filled with chlorobenzene for 1 min to remove the PS spheres, and then placed on a heating plate at 100 °C for 30 min to remove residual chlorobenzene.

#### (6) Fabrication of carbon electrode

A layer of carbon paste is scraped on the surface of the CsPbBr<sub>3</sub> film and annealed at 120 °C for 20 min to obtain the CsPbBr<sub>3</sub> nanonet PD in this experiment.

#### (7) Characterization and measurement of devices

The field emission scanning electron microscope (FESEM, JEOL, JSM-6700F) is used to characterize the SEM images of the CsPbBr<sub>3</sub> nanonet film. X-ray diffraction (XRD, D8 FOCUS X-ray diffraction) is used to characterize the XRD patterns of the film. The UV-Vis-NIR spectrophotometer was used to measure the absorption spectrum of the film. Keithley 2400 source meter is used to measure the I-V and I-t curves of the PD, and the oscilloscope is used to measure the response time of the device. A 405 nm laser is used as the light source, and its intensity was calibrated by a standard silicon photodiode. The PL spectra of the nanonet film are measured using FluoTime 300 (PicoQuant GmbH).

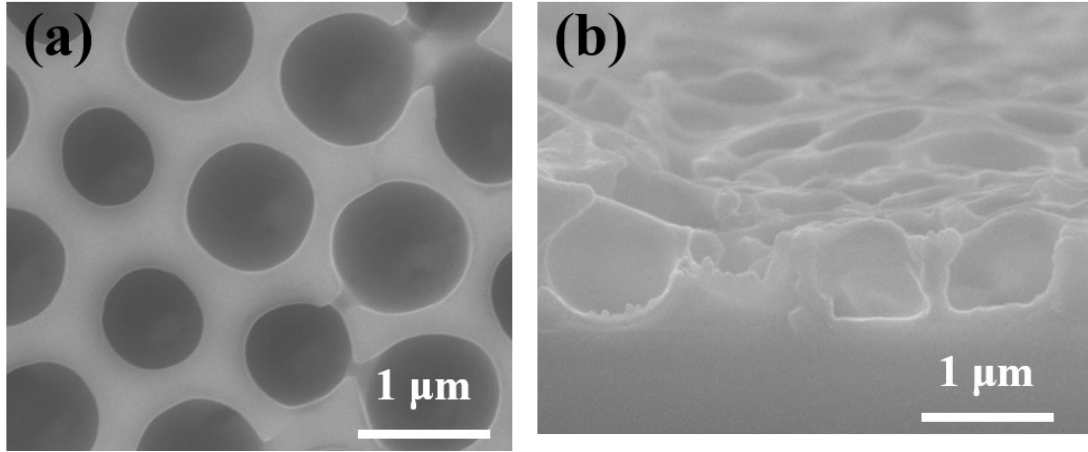

Figure S1 Top (a) and cross-sectional (b) SEM image of the CsPbBr<sub>3</sub> perovskite nanonet film without BMIMBr ionic liquid.

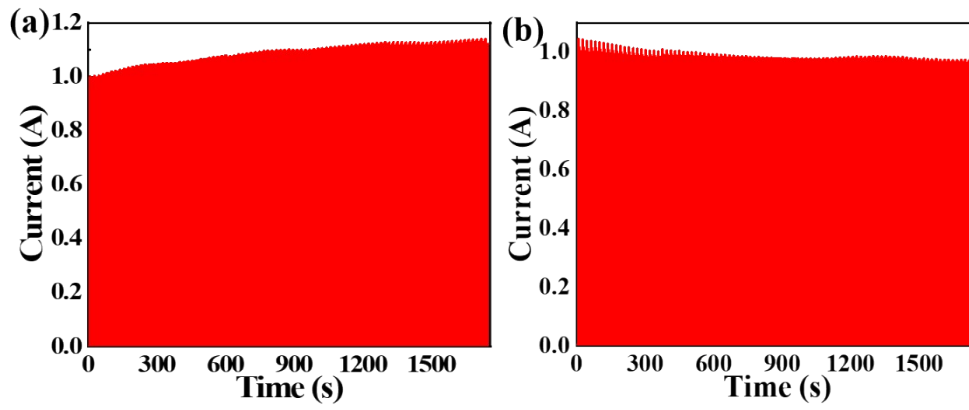

Figure S2 The I-t curve of the CsPbBr<sub>3</sub> PD under 2 mW/cm<sup>2</sup> light: (a) without and with BMIMBr ionic liquid.

Table S1. Performance comparison of reported perovskite based-PDs.

| Device structure                                               | Responsivity (A/W)   | Detectivity (Jones)   | $\tau_{\text{rise}}/\tau_{\text{fall}}$ (ms) | LD R | Ref. |
|----------------------------------------------------------------|----------------------|-----------------------|----------------------------------------------|------|------|
| SnO <sub>2</sub> /Cs <sub>2</sub> AgBiBr <sub>6</sub> / Carbon | $7.5 \times 10^{-2}$ | $1.87 \times 10^{12}$ | 0.24/0.29                                    | -    | 1    |

|                                                                              |       |                       |             |     |           |
|------------------------------------------------------------------------------|-------|-----------------------|-------------|-----|-----------|
| ITO/SnO <sub>2</sub> /MAPbI <sub>3</sub> /Spiro-OMeTAD)/MoO <sub>3</sub> /Cu | 0.48  | $2.7 \times 10^{13}$  | 0.054/0.011 | -   | 2         |
| ZnO/MAPbI <sub>3</sub>                                                       | 0.003 | $1.3 \times 10^{11}$  | 0.006/0.414 | -   | 3         |
| NiO/MAPbI <sub>3</sub> /PMMA/PCBM/ZnO/BCP/Al                                 | 0.47  | $1.07 \times 10^{12}$ | 0.05/0.017  | 127 | 4         |
| Au/CsPbBr <sub>3</sub> (PMMA)/ITO                                            | 3.7   | -                     | 6.6/11.3    | -   | 5         |
| Au/ CsPbBr <sub>3</sub> single crystal/Au                                    | 0.028 | $10^{11}$             | <100        | -   | 6         |
| Au/ CsPbBr <sub>3</sub> /Au                                                  | 55    | $0.9 \times 10^{13}$  | 0.43/0.318  | -   | 7         |
| ITO/SnO <sub>2</sub> /CsPbBr <sub>3</sub> nanonet film/Carbon                | 0.19  | $4.31 \times 10^{12}$ | 0.06/0.26   | 140 | This work |

## References

- (1) Shuang, Z.; Zhou, H.; Wu, D.; Zhang, X.; Xiao, B.; Ma, G.; Zhang, J.; Wang, H. Low-Temperature Process for Self-Powered Lead-Free Cs<sub>2</sub>AgBiBr<sub>6</sub> Perovskite Photodetector with High Detectivity. *Chem. Eng. J.* 2022, 433, 134544.
- (2) Li, G.; Wang, Y.; Huang, L.; Sun, W. High-Performance Self-Powered Perovskite Photodetector Based On Cesium Iodide Doped Spiro-OMeTAD Hole Transport Material. *Journal of Alloys and Compounds* 2022, 907, 164432.
- (3) Yan, J.; Li, Y.; Gao, F.; Gong, W.; Tian, Y.; Li, L. Reconfigurable Self-Powered Imaging Photodetectors by Reassembling and Disassembling ZnO/Perovskite Heterojunctions. *J. Mater. Chem. C* 2022, 10(23), 8922-8930.
- (4) Kim, W.; Park, J.; Aggarwal, Y.; Sharma, S.; Choi, E. H.; Park, B. Highly Efficient and Stable Self-Powered Perovskite Photodiode by Cathode-Side Interfacial Passivation with Poly (Methyl Methacrylate). *Nanomaterials* 2023, 13(3), 619.
- (5) Ou, Z.; Yi, Y.; Hu, Z.; Zhu, J.; Wang, W.; Meng, H.; Zhang, X.; Jing, S.; Xu, S.; Hong, F.; Huang, J.; Qin, J.; Xu, F.; Xu, R.; Zhu, Y.; Wang, L. Improvement of CsPbBr<sub>3</sub> Photodetector Performance

by Tuning the Morphology with PMMA Additive. *Journal of Alloys and Compounds*, 2020 821, 153344.

- (6) Ding, J.; Du, S.; Zuo, Z.; Zhao, Y.; Cui, H.; Zhan, X. High Detectivity and Rapid Response in Perovskite CsPbBr<sub>3</sub> Single-Crystal Photodetector. *J. Phys. Chem. C* 2017, 121(9), 4917-4923.
- (7) Li, Y.; Shi, Z. F.; Li, S.; Lei, L. Z.; Ji, H. F.; Wu, D.; Xu, T.; Tian, Y.; Li, X. J. High-Performance Perovskite Photodetectors Based on Solution-Processed All-Inorganic CsPbBr<sub>3</sub> Thin Films. *J. Mater. Chem. C* 2017, 5(33), 8355-8360.
